# Supplementary material for: Assessment of Spatial Variability across Multiple Pollutants in Auckland, New Zealand
Source: MDPI journal article supplement (doi:10.3390/ijerph16091567), 2019-05-05
Supplement: s1 [file s1]

Supplemental Material:

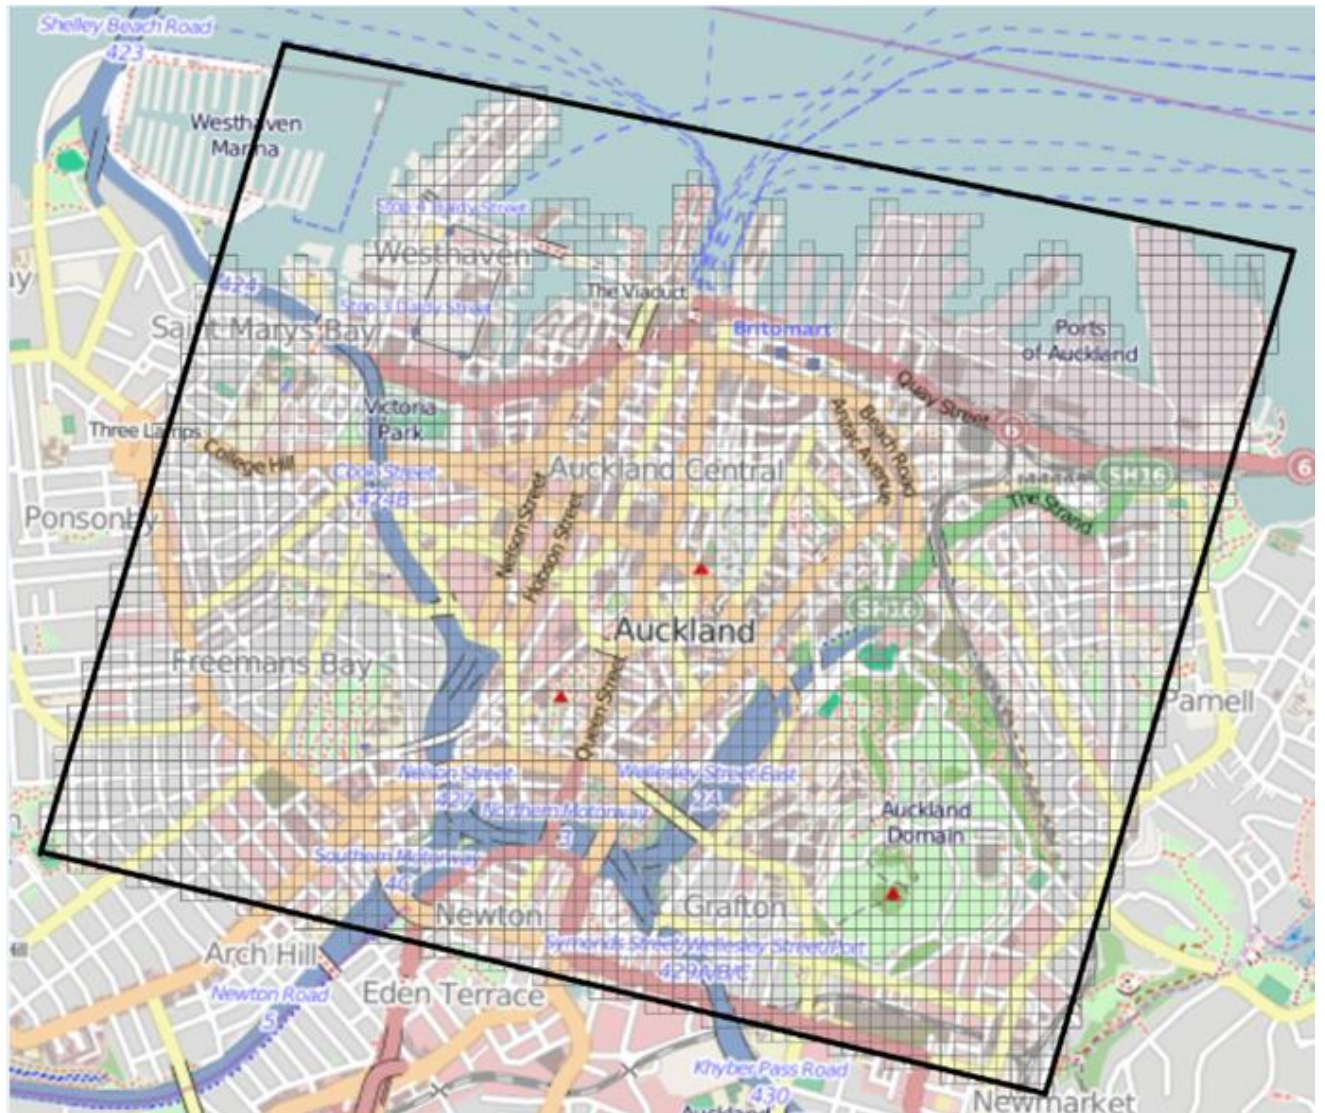

Figure S1. 50 × 50 m grid used for site classification in GIS.

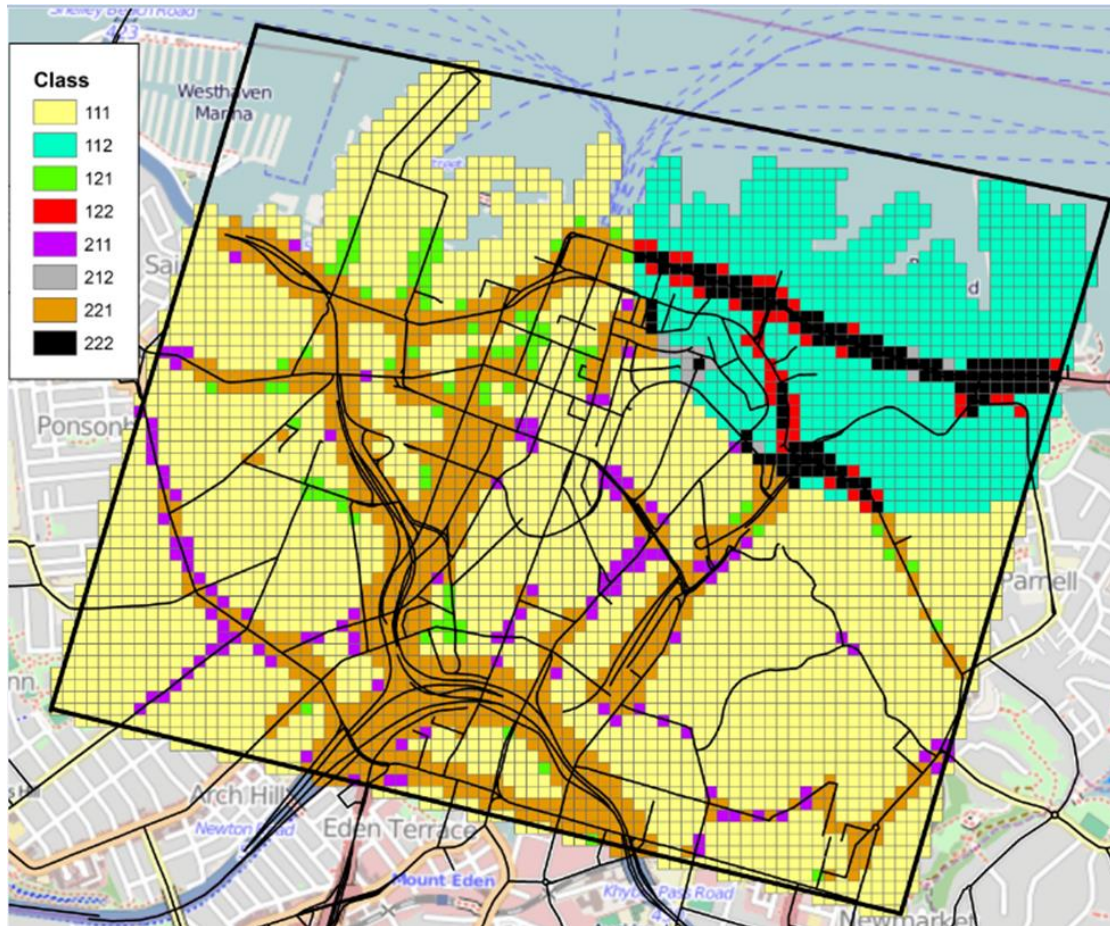

**Figure S2.** Source classification map used for site selection. Numerical class categories refer to (in order): Total traffic density, truck density, distance to port (1 = low, 2 = high, in all cases).

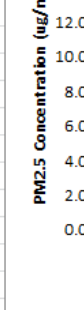

sessions.

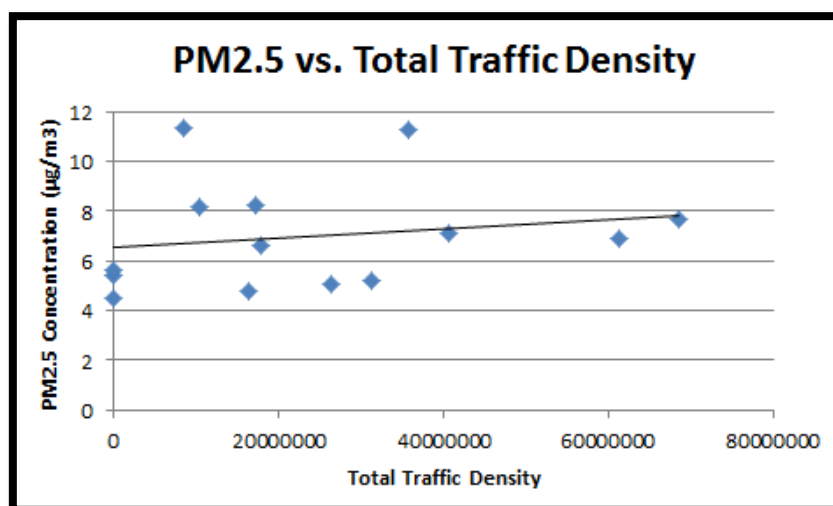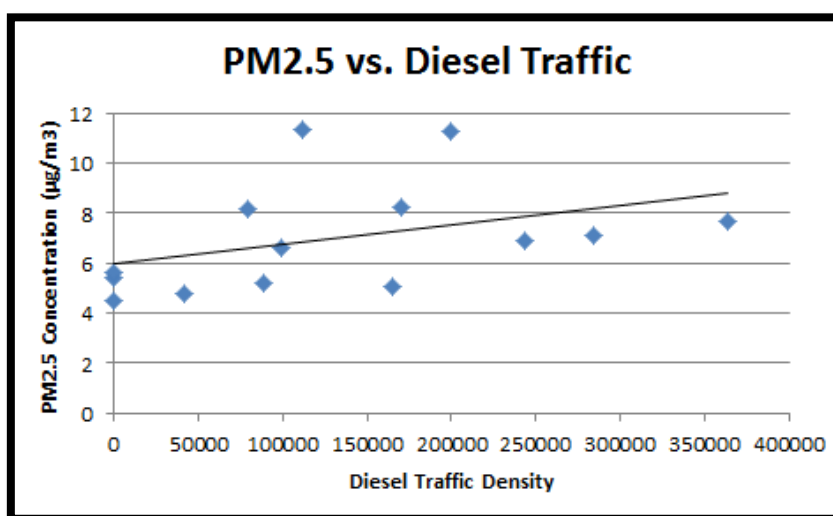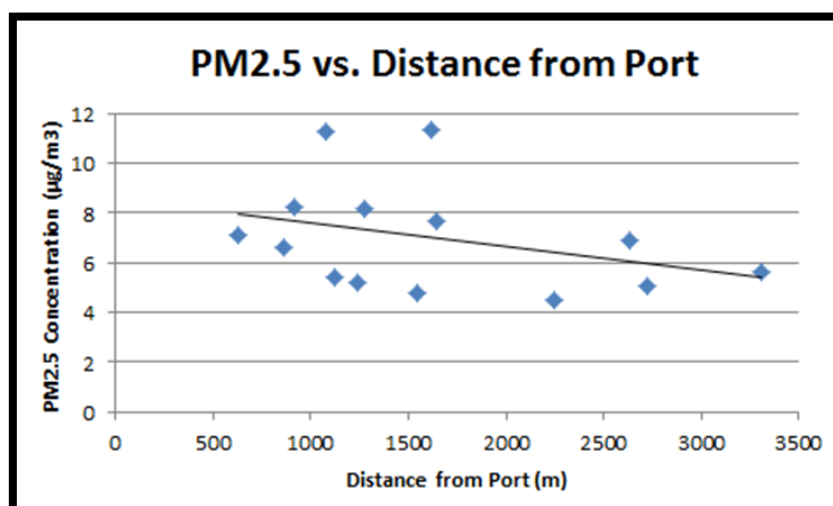

Figure S4. Scatterplots of temporally-adjusted PM<sub>2.5</sub> concentrations vs. source classes.



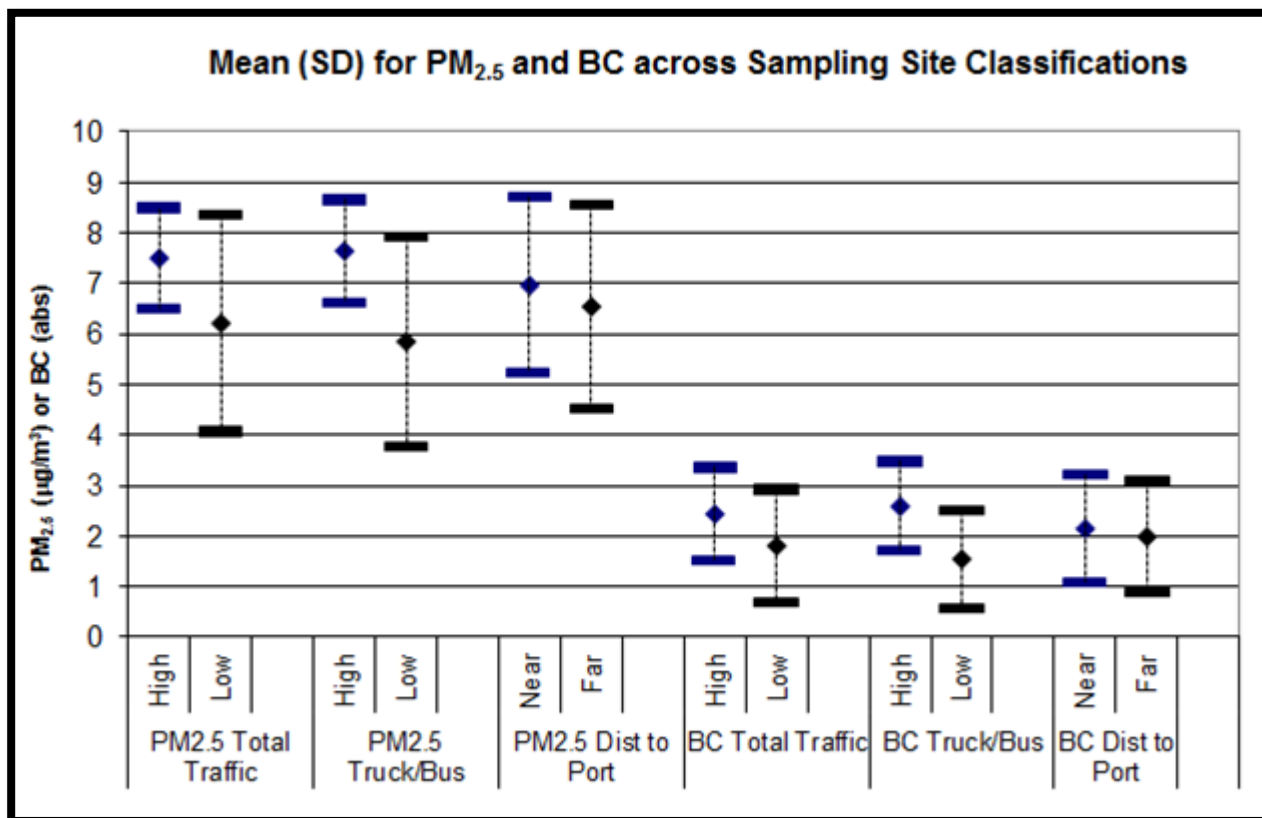

**Figure S5.** Boxplots of PM<sub>2.5</sub> and BC concentrations by source category (Total traffic density, truck density, distance to port). In all cases, we found non-normal distributions in concentrations, and slightly higher average concentrations in the high-source category.

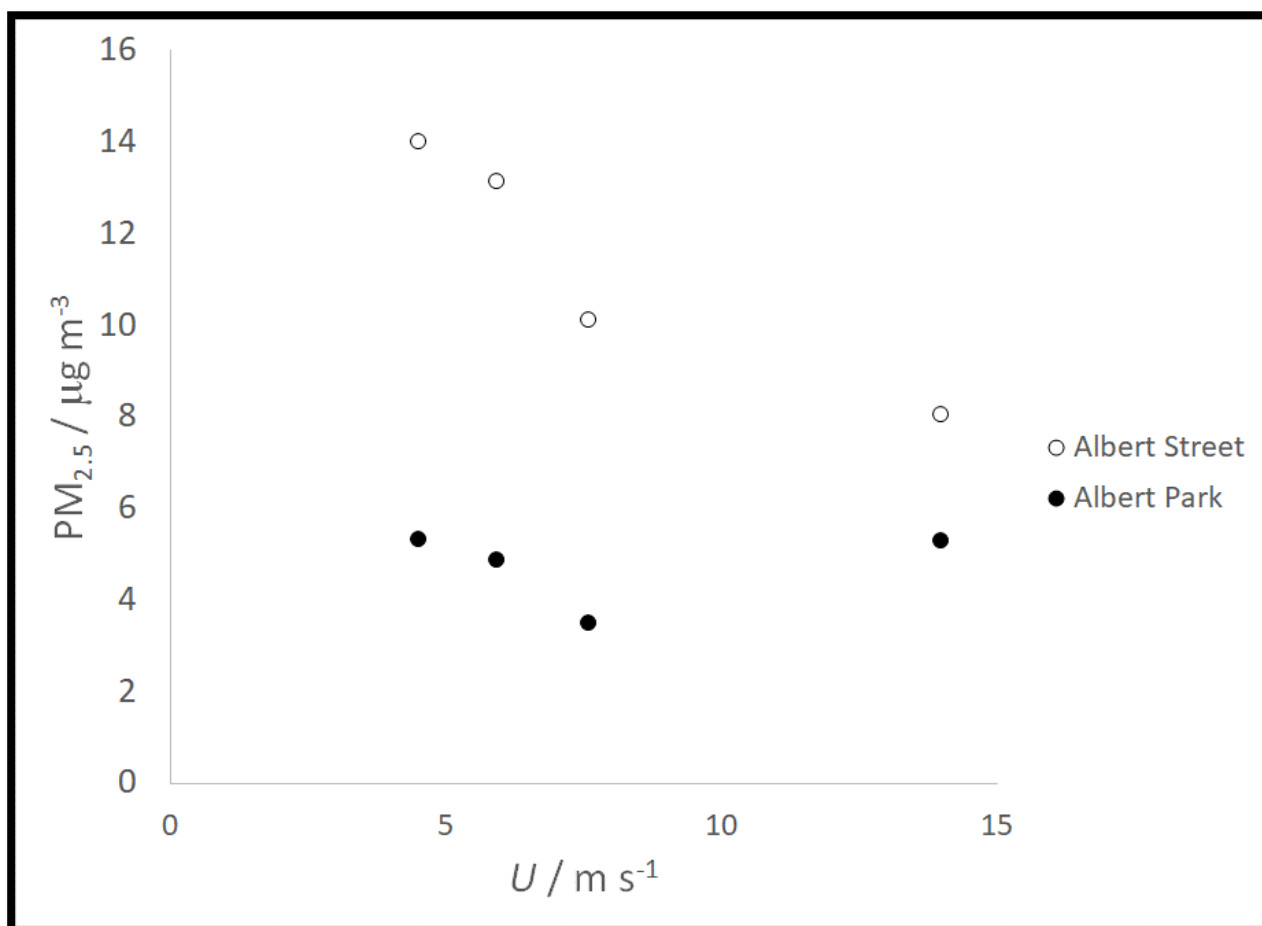

**Figure S6.** PM<sub>2.5</sub> concentration vs. windspeed, across sessions, at two reference sites (Albert St is a low-elevation street canyon in the center of CBD; Albert Park is a high-elevation green park adjacent to the CBD).
